# Supplementary material for: Effects of Quercetin-Loaded Nanoparticles on MCF-7 Human Breast Cancer Cells
Source: PubMed Central journal article supplement (PMC6524048; doi:10.3390/medicina55040114), 2019-04-22
Supplement: medicina-55-00114-s001.pdf [file medicina-55-00114-s001.pdf]

**Table S1.** DMSO effects on viability of MCF-7 and MCF-10A.

| Treatments      | Cells   | Viability (%) |
|-----------------|---------|---------------|
| Untreated cells | MCF-7   | 100±0.05      |
|                 | MCF-10A | 100±0.04      |
| QT+DMSO         | MCF-7   | 51.7±4.6*     |
|                 | MCF-10A | 99.7±0.23     |
| DMSO            | MCF-7   | 98.6±0.23     |
|                 | MCF-10A | 99.4±0.23     |

Values are expressed as mean ± SD (n=6). \*  $p < 0.01$ , \* indicates comparison to untreated cells.

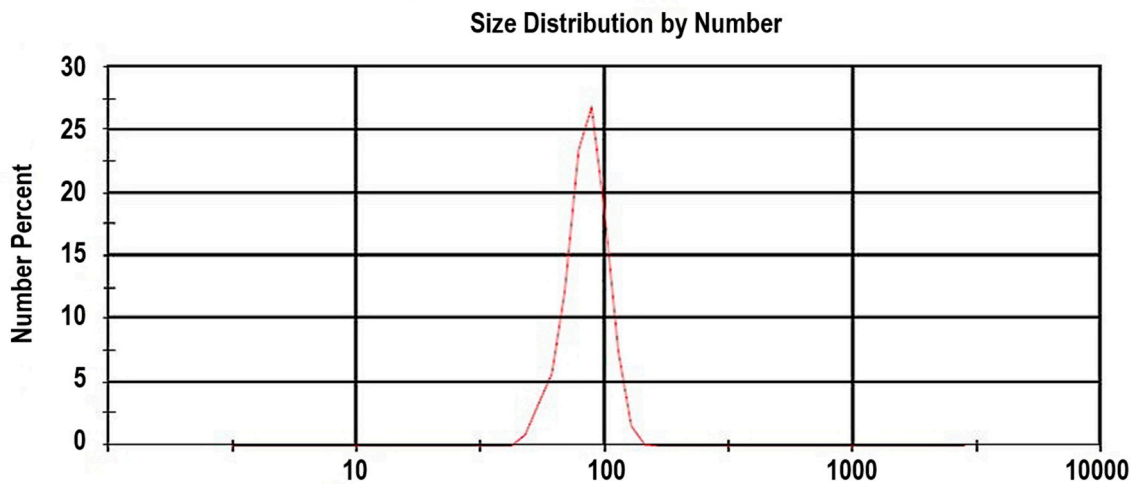

**Figure S1.** Size distribution of QT-loaded SLNs.

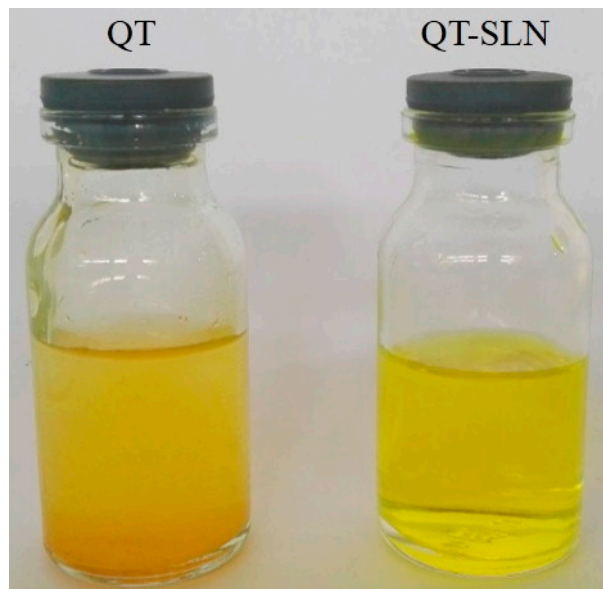

**Figure S2.** Free QT and QT-SLN in water.

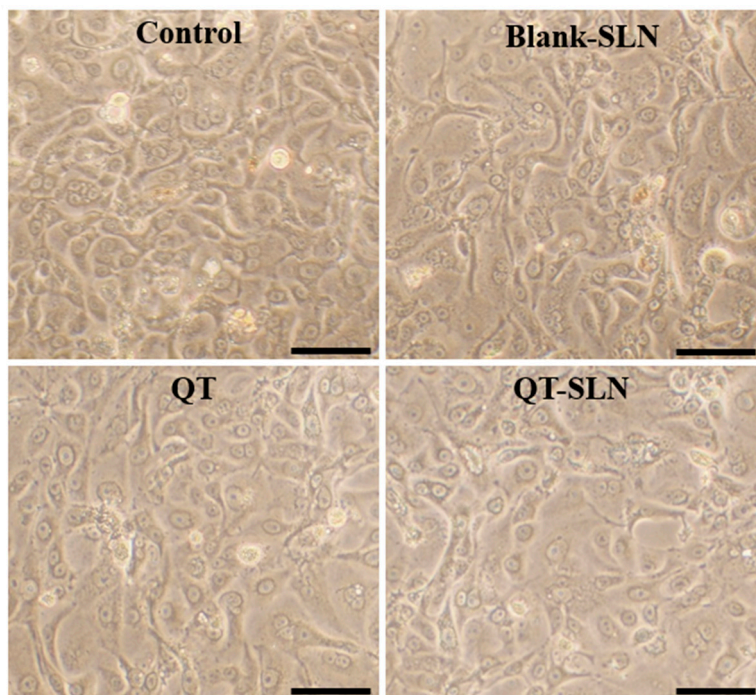

Figure S3. Morphology of MCF-10A cells in different groups. Scale bars: 100  $\mu$ m.

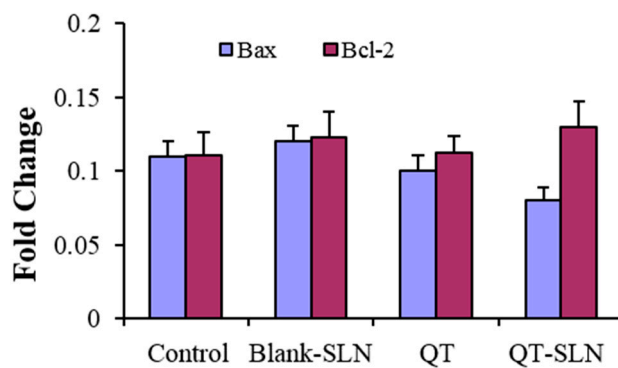

Figure S4. Gene expression for MCF-10A in different groups. Expression is normalized to average of housekeeping gene (*GAPDH*). Values are expressed as mean  $\pm$  SD.
